# Supplementary material for: Seasonal PM 2.5 exposures induce differential responses to influenza A virus infection in primary human airway epithelial cells
Source: Research Square preprint supplement (doi:10.21203/rs.3.rs-6890544/v1), 2025-07-10
Supplement: Supplementary file 1 [file e619547938a47583fd10ee67.docx]

**Supplemental Table S1.** Log2 fold change and adjusted p values of Influenza H1N1 genes following indicated PM exposures.

|  | Winter 2h Log2 FC | Winter 2h adj P Val | Spring 2h Log2 FC | Spring 2h adj P Val | Summer 2h Log2 FC | Summer 2h adj P Val | Fall 2h Log2 FC | Fall 2h adj P Val |
| --- | --- | --- | --- | --- | --- | --- | --- | --- |
| NEP | -0.112427998 | 0.781414762 | -0.05457414 | 0.91371377 | -0.043779238 | 0.672148812 | -0.166456355 | 0.97402613 |
| NP | -0.032933244 | 0.781414762 | 0.383033126 | 0.917362854 | 0.220846374 | 0.672148812 | 0.216487246 | 0.97402613 |
| NS1 | 0.040292271 | 0.781414762 | 0.1063144 | 0.917362854 | 0.109529082 | 0.672148812 | 0.034999308 | 0.97402613 |
| M2 | -0.077996432 | 0.781414762 | 0.141035305 | 0.917362854 | 0.33720564 | 0.672148812 | -0.035218175 | 0.97402613 |
| PA | 0.120370013 | 0.781414762 | 0.168101092 | 0.917362854 | 0.226540483 | 0.672148812 | -0.016282091 | 0.97402613 |
| PA-X | 0.170842794 | 0.781414762 | 0.117931554 | 0.917362854 | 0.195030935 | 0.672148812 | 0.057089504 | 0.97402613 |
| PB2 | 0.078080069 | 0.781414762 | -0.065033577 | 0.917362854 | 0.075412314 | 0.800632972 | 0.018584505 | 0.97402613 |
| PB1 | 0.11042274 | 0.781414762 | 0.022199466 | 0.917362854 | -0.051869944 | 0.800632972 | 0.061343626 | 0.97402613 |
| NA | 0.085286182 | 0.781414762 | 0.01949858 | 0.917362854 | 0.022158262 | 0.800632972 | 0.026943768 | 0.97402613 |
| M1 | 0.015353807 | 0.877964238 | 0.034913988 | 0.935286139 | -0.021204377 | 0.800632972 | 0.021457715 | 0.97402613 |
| HA | -0.001670845 | 0.976595601 | 0.005041897 | 0.935286139 | 0.014137739 | 0.80878725 | -0.008165253 | 0.97402613 |

|  | Winter 24h Log2 FC | Winter 24h adj P Val | Spring 24h Log2 FC | Spring 24h adj P Val | Summer 24h Log2 FC | Summer 24h adj P Val | Fall 24h Log2 FC | Fall 24h adj P Val |
| --- | --- | --- | --- | --- | --- | --- | --- | --- |
| NEP | 0.050520743 | 0.987940273 | -0.040424135 | 0.092212705 | 0.081835388 | 0.593811538 | 0.11531719 | 0.235358822 |
| NP | 0.028819317 | 0.987940273 | 0.063988266 | 0.441974815 | -0.027566928 | 0.963934376 | 0.046431327 | 0.811937252 |
| NS1 | -0.010554629 | 0.987940273 | 0.039588957 | 0.441974815 | 0.01388407 | 0.963934376 | -0.103120027 | 0.940779457 |
| M2 | -0.029217177 | 0.987940273 | 0.060880296 | 0.441974815 | -0.00742604 | 0.963934376 | -0.01727303 | 0.940779457 |
| PA | 0.016698541 | 0.987940273 | 0.055979136 | 0.441974815 | -0.017110358 | 0.963934376 | -0.01207258 | 0.940779457 |
| PA-X | -0.006013439 | 0.987940273 | 0.047639951 | 0.441974815 | 0.009312889 | 0.963934376 | -0.005318451 | 0.940779457 |
| PB2 | 0.004349175 | 0.987940273 | -0.033101857 | 0.482488567 | 0.010476539 | 0.963934376 | -0.012595994 | 0.940779457 |
| PB1 | 0.00480414 | 0.987940273 | 0.063748998 | 0.890157768 | -0.005884113 | 0.963934376 | -0.010874422 | 0.940779457 |
| NA | 0.003282629 | 0.987940273 | -0.008515556 | 0.890157768 | -0.00576701 | 0.963934376 | -0.009889865 | 0.940779457 |
| M1 | 0.008997052 | 0.987940273 | -0.006377668 | 0.890157768 | 0.008472034 | 0.963934376 | -0.006776608 | 0.940779457 |
| HA | -0.000483282 | 0.987940273 | 0.001911097 | 0.956226418 | -0.001457666 | 0.963934376 | 0.003691964 | 0.940779457 |
